# Supplementary material for: Characteristics of a Widespread Community Cluster of H275Y Oseltamivir-Resistant A(H1N1)pdm09 Influenza in Australia
Source: PubMed Central journal article supplement — J Infect Dis. 2012 May 4;206(2):148–57. doi: 10.1093/infdis/jis337 (PMC3379839; doi:10.1093/infdis/jis337), 2012-05-04
Supplement: supp_jis337_jis337supp.pdf [file supp_jis337_jis337supp.pdf]

Supplementary data

Supplementary Table 1. Antigenic analysis of oseltamivir-resistant H275Y variants and oseltamivir-sensitive A(H1N1)pdm09 viruses detected in Hunter New England health district.

Reference Antiserum

|                                                        | CAL/7                  | AUCK/1 | PHIL/344 | ILLINOIS/9 | BRIS/2013 | BAY/69 | BRIS/10 | CHCH/16 | PERTH/198 | VIC/918 | BRIS/70 |      |
|--------------------------------------------------------|------------------------|--------|----------|------------|-----------|--------|---------|---------|-----------|---------|---------|------|
| Reference Antigens                                     | A/CALIFORNIA/7/2009    | 2560   | 640      | 640        | 640       | 2560   | 640     | 2560    | 1280      | 2560    | 5120    | 2560 |
|                                                        | A/AUCKLAND/1/2009      | 5120   | 1280     | 640        | 1280      | 2560   | 320     | 640     | 320       | 1280    | 5120    | 2560 |
|                                                        | A/PHILIPPINES/344/2004 | 1280   | 320      | 640        | 640       | 1280   | 160     | 1280    | 640       | 1280    | 2560    | 1280 |
|                                                        | A/ILLINOIS/9/2007      | 2560   | 640      | 640        | 1280      | 2560   | 320     | 1280    | 640       | 1280    | 2560    | 1280 |
|                                                        | A/BRISBANE/2013/2009   | 640    | 160      | 80         | 320       | 640    | 320     | 640     | 320       | 640     | 1280    | 640  |
|                                                        | A/BAYERN/69/2009       | <80    | <40      | <40        | <40       | 40     | 320     | 160     | 40        | 40      | <80     | <40  |
|                                                        | A/BRISBANE/10/2010     | 640    | 160      | 160        | 320       | 640    | 640     | 5120    | 2560      | 640     | 1280    | 1280 |
|                                                        | A/CHRISTCHURCH/16/2010 | 2560   | 320      | 320        | 640       | 1280   | 1280    | 5120    | 2560      | 1280    | 2560    | 1280 |
|                                                        | A/PERTH/198/2010       | 640    | 160      | 160        | 320       | 640    | 320     | 640     | 320       | 640     | 1280    | 1280 |
|                                                        | A/VICTORIA/918/2010    | 2560   | 320      | 320        | 640       | 1280   | 320     | 1280    | 640       | 1280    | 1280    | 2560 |
| A/BRISBANE/70/2011                                     | 1280                   | 320    | 320      | 640        | 1280      | 640    | 1280    | 640     | 1280      | 1280    | 2560    |      |
| Oseltamivir-sensitive<br>A(H1N1)pdm09 viruses          | A/NEWCASTLE/24/2011    | 1280   | 160      | 160        | 320       | 640    | 640     | 640     | 640       | 640     | 320     | 640  |
|                                                        | A/NEWCASTLE/55/2011    | 640    | 320      | 160        | 320       | 640    | 320     | 640     | 320       | 640     | 640     | 1280 |
|                                                        | A/NEWCASTLE/25/2011    | 1280   | 320      | 160        | 320       | 640    | 320     | 640     | 320       | 640     | 640     | 640  |
|                                                        | A/NEWCASTLE/69/2011    | 1280   | 320      | 320        | 640       | 640    | 320     | 1280    | 640       | 1280    | 1280    | 1280 |
|                                                        | A/NEWCASTLE/72/2011    | 2560   | 320      | 160        | 640       | 1280   | 640     | 1280    | 640       | 1280    | 2560    | 1280 |
|                                                        | A/NEWCASTLE/95/2011    | 640    | 160      | 160        | 160       | 640    | 320     | 640     | 320       | 640     | 1280    | 640  |
|                                                        | A/NEWCASTLE/129/2011   | 320    | 160      | <40        | 80        | 640    | 320     | 640     | 320       | 1280    | 640     | 640  |
|                                                        | A/NEWCASTLE/53/2011    | 1280   | 320      | 320        | 320       | 1280   | 320     | 640     | 320       | 640     | 1280    | 1280 |
| Oseltamivir-resistant<br>H275Y A(H1N1)pdm09<br>viruses | A/NEWCASTLE/62/2011    | 1280   | 320      | 320        | 640       | 1280   | 320     | 640     | 640       | 640     | 1280    | 2560 |
|                                                        | A/NEWCASTLE/132/2011   | 640    | 160      | 160        | 320       | 640    | 160     | 640     | 320       | 640     | 1280    | 640  |
|                                                        | A/NEWCASTLE/151/2011   | 640    | 160      | 160        | 320       | 640    | 160     | 640     | 320       | 640     | 1280    | 640  |
|                                                        | A/NEWCASTLE/85/2011    | 640    | 160      | 160        | 320       | 640    | 320     | 640     | 320       | 1280    | 1280    | 1280 |
|                                                        | A/NEWCASTLE/89/2011    | 640    | 160      | 160        | 320       | 1280   | 320     | 640     | 320       | 1280    | 1280    | 1280 |
|                                                        | A/NEWCASTLE/17/2011    | 640    | 160      | 160        | 160       | 160    | 320     | 640     | 640       | 320     | 640     | 640  |
|                                                        | A/NEWCASTLE/82/2011    | 1280   | 320      | 320        | 640       | 1280   | 320     | 640     | 320       | 1280    | 1280    | 1280 |
|                                                        | A/NEWCASTLE/37/2011    | 1280   | 320      | 320        | 640       | 1280   | 320     | 640     | 640       | 1280    | 2560    | 1280 |
|                                                        | A/NEWCASTLE/2/2011     | 1280   | 320      | 320        | 640       | 1280   | 320     | 1280    | 640       | 640     | 1280    | 1280 |

Supplementary Figure 1. Comprehensive phylogenetic trees of hemagglutinin (A) and neuraminidase (B) sequences of oseltamivir- resistant H275Y variants and oseltamivir-sensitive wild type A(H1N1)pdm09 viruses detected in Hunter New England health district since March 2011 together with global strains downloaded from GISAID

See separate files
