# Supplementary figures and images for: Characteristics of a Widespread Community Cluster of H275Y Oseltamivir-Resistant A(H1N1)pdm09 Influenza in Australia
Source: PubMed Central journal article supplement — J Infect Dis. 2012 May 4;206(2):148–57. doi: 10.1093/infdis/jis337 (PMC3379839; doi:10.1093/infdis/jis337), 2012-05-04

Supplementary Figure 1A

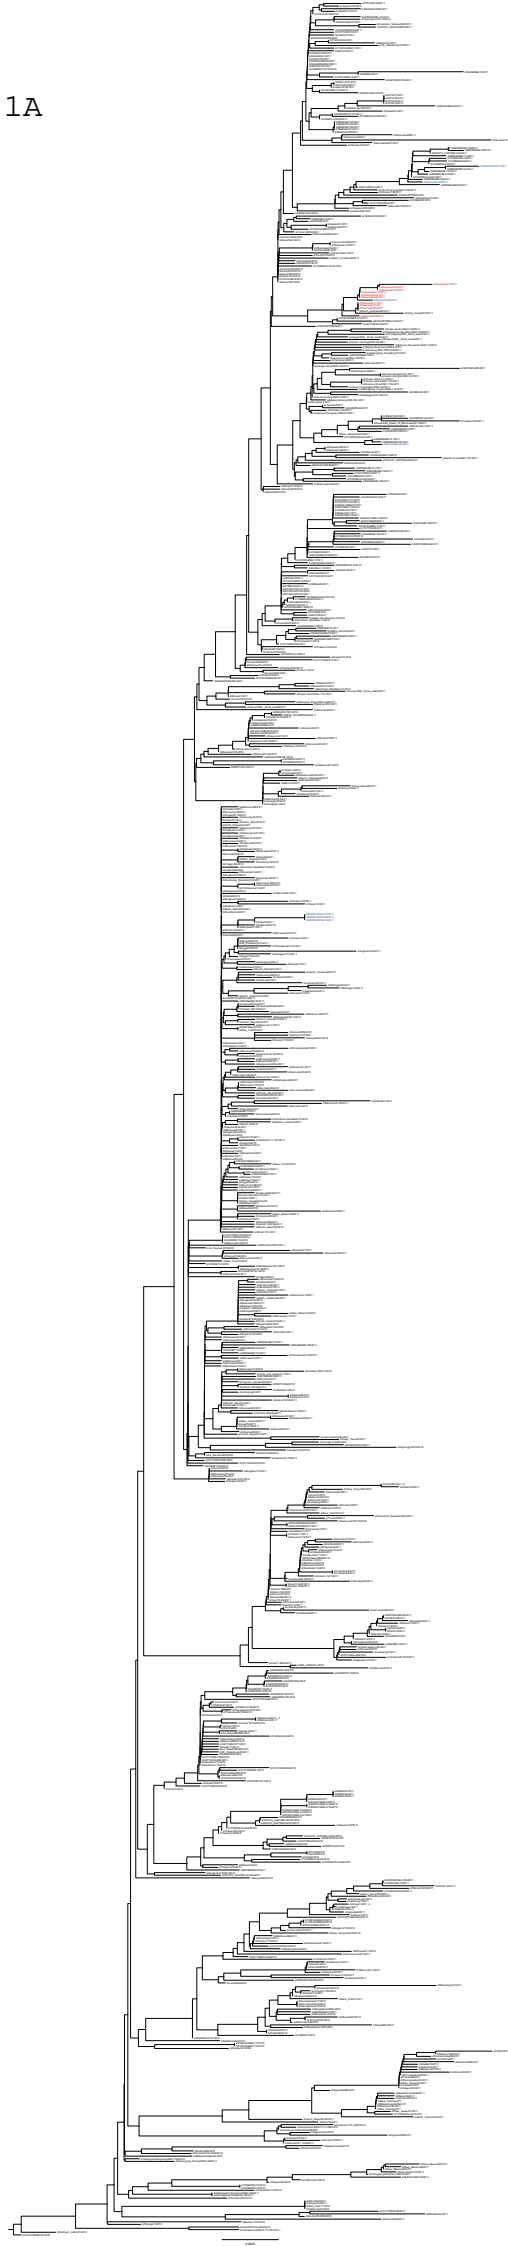

Supplementary Figure 1B

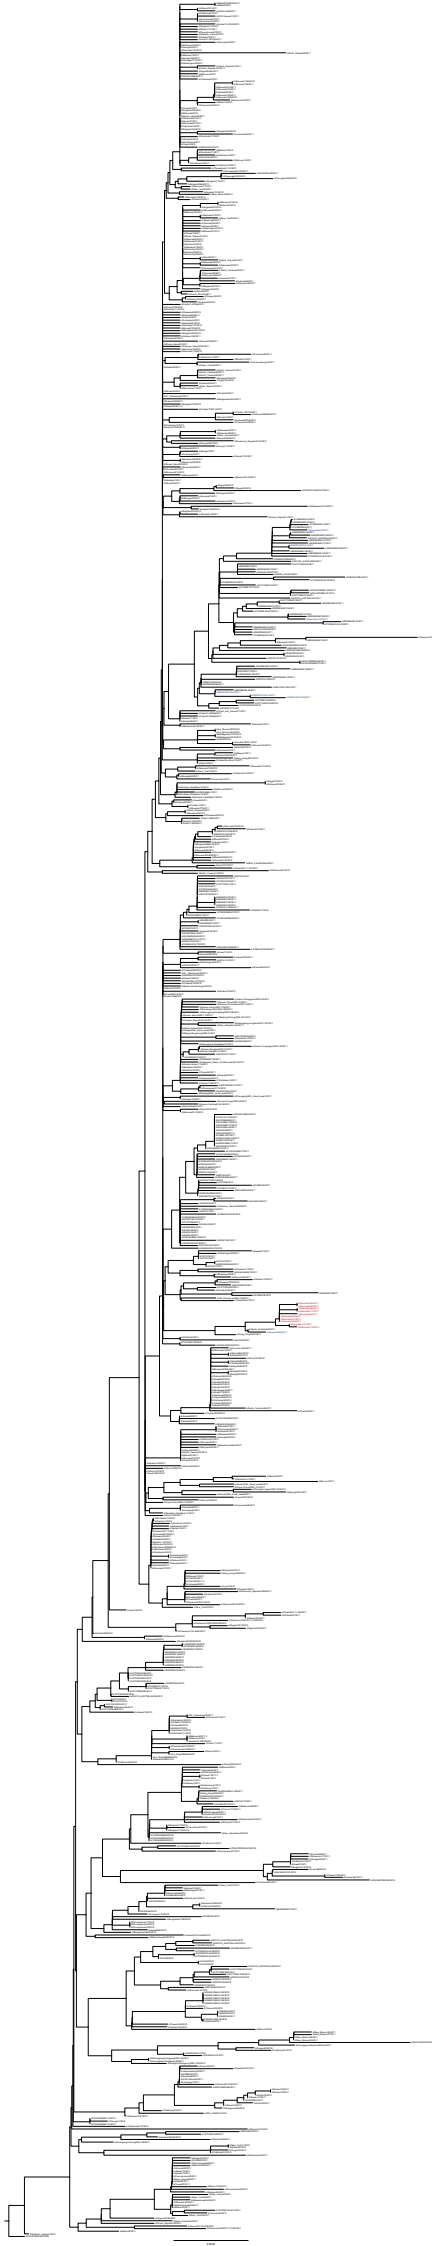

Supplement: supp_jis337_jis337supp_fig.pdf [file supp_jis337_jis337supp_fig.pdf]
